# Supplementary material
Source: publisher site journal article supplement (http://www.e-cmh.org/upload/media/cmh-2021-0188-suppl9.pdf)
Supplement: Supplementary file 1 [file cmh-2021-0188-suppl9.pdf]

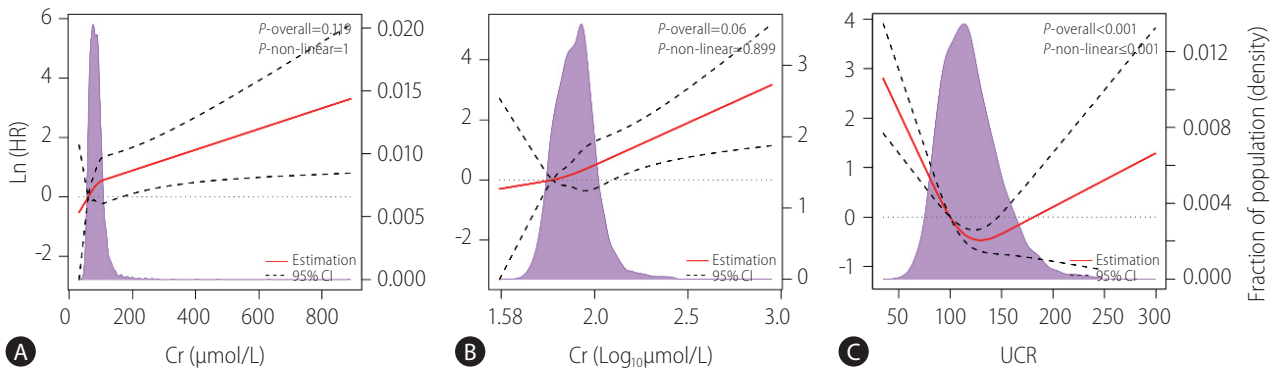

**Supplementary Figure 2.** The restricted cubic spline on the association between (A) serum creatinine level, (B) creatinine level after log transformation, (C) urea-to-creatinine ratio and hepatic decompensation in the liver stiffness measurement cohort. The solid red lines represented the adjusted hazard ratios (natural logarithm value), with dashed lines representing the 95% confidence intervals (CIs) derived from restricted cubic spline with four knots. Reference lines for no association are indicated by the dashed lines at a log HR of zero. The purple regions showed the fraction of the population. HR, hazard ratio; Cr, creatinine; UCR, urea-to-creatinine ratio.
